# Supplementary material
Source: PubMed Central journal article supplement (PMC4982773)
Supplement: NIHMS781008-supplement-Supplemental_Data_File___doc___tif__pdf__etc__.pdf [file NIHMS781008-supplement-Supplemental_Data_File___doc___tif__pdf__etc__.pdf]

**A1. Change in average monthly health care use following the transition to Dual enrollment among adults with psychiatric disabilities, Missouri 2004 - 2007**

| MISSOURI                                                                   | A        | B        | C        | D        | E        |
|----------------------------------------------------------------------------|----------|----------|----------|----------|----------|
| Person-months (N)                                                          | 175711   | 175711   | 110048   | 162093   | 167715   |
| <b>ANY USE (<math>\beta</math>)</b>                                        |          |          |          |          |          |
| Outpatient, all cause                                                      | 0.246**  | 0.246**  | 0.177**  | 0.248**  | 0.255**  |
| Outpatient, MHSUD                                                          | 0.0657** | 0.0684** | 0.0684** | 0.0804** | 0.0643** |
| Emergency department, all cause                                            | 0.215**  | 0.236**  | 0.254**  | 0.230**  | 0.223**  |
| Emergency department, MHSUD                                                | 0.216**  | 0.250**  | 0.286**  | 0.212**  | 0.202**  |
| Inpatient admission, all cause                                             | 0.102*   | 0.106    | 0.180**  | 0.108*   | 0.106*   |
| Inpatient admission, MHSUD                                                 | 0.182**  | 0.244**  | 0.202**  | 0.193**  | 0.169**  |
|                                                                            |          |          |          |          |          |
| <b>QUANTITY OF USE (<math>\beta</math>)</b>                                |          |          |          |          |          |
| Outpatient visits, all cause                                               | 0.0697** | 0.0579** | 0.0431** | 0.0871** | 0.0678** |
| Outpatient visits, MHSUD                                                   | -0.00916 | -0.015   | -0.0199  | 0.0215   | -0.0096  |
| Emergency department visits, all cause                                     | 0.269**  | 0.272**  | 0.326**  | 0.289**  | 0.270**  |
| Emergency department visits, MHSUD                                         | 0.280**  | 0.299**  | 0.339**  | 0.253**  | 0.261**  |
| Inpatient admissions, all cause                                            | 0.105*   | 0.121*   | 0.182**  | 0.0885   | 0.105*   |
| Inpatient admissions, MHSUD                                                | 0.166**  | 0.228**  | 0.177**  | 0.165*   | 0.155*   |
| Inpatient days, all cause                                                  | 0.438**  | 0.395**  | 0.439**  | 0.407**  | 0.324**  |
| Inpatient days, MHSUD                                                      | 0.595**  | 0.496**  | 0.520**  | 0.559**  | 0.486**  |
|                                                                            |          |          |          |          |          |
| Enrollment duration, pre and post transition                               | X        | X        | X        | X        | X        |
| Person-level demographics                                                  | X        | X        | X        | X        | X        |
| Transition year fixed effects                                              | X        | X        | X        | X        | X        |
| Include only subject with a diagnosis of bipolar disorder or schizophrenia |          |          | X        |          |          |
| Exclude transition months (-1,0,+1)                                        |          |          |          | X        |          |
| Exclude subjects with inpatient stay > 3months pre or post transition      |          |          |          |          | X        |
| Include quadratic terms for pre and post trends                            |          | X        |          |          |          |

Authors' calculations using merged Medicare and Medicaid claims and enrollment data. Binomial and gamma-log GEE coefficients are presented for "any use" and "quantity of use" outcomes respectively.

MHSUD refers to mental health or substance use diagnosis.

All models include age, sex, race, months observed pre-transition, months observed post-transition and transition year fixed effects. Gamma-log models include all beneficiaries yielding estimates of unconditional use.

\*p < 0.05, \*\*p < 0.01

**A2. Change in average monthly health care use following the transition to Dual enrollment among adults with psychiatric disabilities, South Carolina 2004 - 2007**

| <b>South Carolina</b>                                                      | <b>A</b> | <b>B</b> | <b>C</b> | <b>D</b> | <b>E</b> |
|----------------------------------------------------------------------------|----------|----------|----------|----------|----------|
| Person-months (N)                                                          | 52899    | 52899    | 33079    | 53591    | 51988    |
| <b>ANY USE (<math>\beta</math>)</b>                                        |          |          |          |          |          |
| Outpatient, all cause                                                      | 0.0980*  | 0.0428   | 0.0843   | 0.198**  | 0.103*   |
| Outpatient, MHSUD                                                          | 0.0506   | 0.00711  | 0.07     | 0.105*   | 0.0517   |
| Emergency department, all cause                                            | 0.0958   | 0.109    | 0.0932   | 0.0755   | 0.0971   |
| Emergency department, MHSUD                                                | 0.161    | 0.0755   | 0.246    | 0.125    | 0.153    |
| Inpatient admission, all cause                                             | 0.246**  | 0.264*   | 0.350**  | 0.126    | 0.254**  |
| Inpatient admission, MHSUD                                                 | 0.357**  | 0.329    | 0.540**  | 0.172    | 0.342*   |
|                                                                            |          |          |          |          |          |
| <b>QUANTITY OF USE (<math>\beta</math>)</b>                                |          |          |          |          |          |
| Outpatient visits, all cause                                               | -0.00234 | -0.0173  | -0.028   | 0.0492   | -0.00121 |
| Outpatient visits, MHSUD                                                   | 0.0202   | 0.0036   | 0.0153   | -0.0381  | 0.0213   |
| Emergency department visits, all cause                                     | 0.0905   | 0.116    | 0.07     | 0.0511   | 0.0924   |
| Emergency department visits, MHSUD                                         | 0.047    | -0.0925  | 0.0845   | 0.0913   | 0.0485   |
| Inpatient admissions, all cause                                            | 0.260**  | 0.268*   | 0.295**  | 0.144    | 0.268**  |
| Inpatient admissions, MHSUD                                                | 0.374**  | 0.337    | 0.540**  | 0.169    | 0.366**  |
| Inpatient days, all cause                                                  | 0.542**  | 0.588**  | 0.892**  | 0.350*   | 0.573**  |
| Inpatient days, MHSUD                                                      | 0.870**  | 0.978**  | 1.090**  | 0.456    | 0.907**  |
|                                                                            |          |          |          |          |          |
| Enrollment duration, pre and post transition                               | X        | X        | X        | X        | X        |
| Person-level demographics                                                  | X        | X        | X        | X        | X        |
| Transition year fixed effects                                              | X        | X        | X        | X        | X        |
| Include only subject with a diagnosis of bipolar disorder or schizophrenia |          |          | X        |          |          |
| Exclude transition months (-1,0,+1)                                        |          |          |          | X        |          |
| Exclude subjects with inpatient stay > 3months pre or post transition      |          |          |          |          | X        |
| Include quadratic terms for pre and post trends                            |          | X        |          |          |          |

Authors' calculations using merged Medicare and Medicaid claims and enrollment data. Binomial and gamma-log GEE coefficients are presented for "any use" and "quantity of use" outcomes respectively.

MHSUD refers to mental health or substance use diagnosis.

All models include age, sex, race, months observed pre-transition, months observed post-transition and transition year fixed effects. Gamma-log models include all beneficiaries yielding estimates of unconditional use.

\*p < 0.05, \*\*p < 0.01

**A3. Change in average monthly health care use following the transition to dual enrollment among adults with psychiatric disabilities, Missouri 2004-2007.**

Complete regression results for preferred specification.

|                                           | BINARY OUTCOMES     |                    |                     |                    |                    |                     | COUNT/CONTINUOUS OUTCOMES |                    |                     |                    |                     |                           |                    |                      |
|-------------------------------------------|---------------------|--------------------|---------------------|--------------------|--------------------|---------------------|---------------------------|--------------------|---------------------|--------------------|---------------------|---------------------------|--------------------|----------------------|
|                                           | Outpatient          | Outpatient MHSUD   | ED                  | ED MHSUD           | Inpatient          | Inpatient MHSUD     | Outpatient                | Outpatient MHSUD   | ED                  | ED MHSUD           | Inpatient Admission | Inpatient Admission MHSUD | Inpatient Days     | Inpatient MHSUD days |
| Baseline trend                            | 0.00144<br>0.002    | 0.00917**<br>0.003 | -0.00397<br>0.003   | -0.0134*<br>0.006  | -0.00957*<br>0.004 | -0.0210**<br>0.006  | 0.00202<br>0.002          | 0.00412<br>0.003   | -0.0024<br>0.003    | -0.0138*<br>0.006  | -0.00836*<br>0.004  | -0.0206**<br>0.006        | -0.0107<br>0.008   | -0.0186<br>0.012     |
| Dual Coverage                             | 0.246**<br>0.022    | 0.0657**<br>0.021  | 0.215**<br>0.029    | 0.216**<br>0.056   | 0.102*<br>0.042    | 0.182**<br>0.06     | 0.0697**<br>0.013         | -0.00916<br>0.016  | 0.269**<br>0.032    | 0.280**<br>0.061   | 0.105*<br>0.041     | 0.166**<br>0.061          | 0.438**<br>0.08    | 0.595**<br>0.124     |
| Trend change                              | -0.00343<br>0.003   | -0.0117**<br>0.003 | 0.00536<br>0.003    | 0.0148*<br>0.006   | 0.00937*<br>0.004  | 0.0208**<br>0.006   | -0.00640**<br>0.002       | -0.0109**<br>0.003 | 0.0049<br>0.004     | 0.0161*<br>0.006   | 0.00795<br>0.004    | 0.0212**<br>0.006         | 0.0173*<br>0.008   | 0.0313*<br>0.013     |
| Transition year, 2005                     | -0.195**<br>0.029   | -0.193**<br>0.033  | 0.0855**<br>0.031   | 0.0504<br>0.058    | 0.0655<br>0.045    | 0.105<br>0.062      | -0.0838*<br>0.033         | -0.113*<br>0.049   | 0.0683<br>0.038     | 0.0521<br>0.067    | 0.0388<br>0.045     | 0.102<br>0.066            | 0.0247<br>0.085    | 0.0562<br>0.131      |
| Transition year, 2006                     | -0.0432<br>0.029    | 0.0449<br>0.032    | -0.0274<br>0.031    | -0.115*<br>0.057   | 0.0128<br>0.044    | -0.101<br>0.061     | 0.116**<br>0.032          | 0.166**<br>0.047   | -0.00309<br>0.038   | -0.121<br>0.066    | 0.00351<br>0.045    | -0.0648<br>0.066          | 0.351**<br>0.084   | 0.325*<br>0.13       |
| Transition year, 2007                     | -0.137**<br>0.04    | -0.0344<br>0.045   | 0.000949<br>0.045   | -0.122<br>0.083    | 0.0659<br>0.062    | -0.0227<br>0.087    | 0.0364<br>0.045           | 0.0715<br>0.067    | -0.0162<br>0.053    | -0.127<br>0.093    | 0.015<br>0.063      | -0.0291<br>0.092          | 0.136<br>0.118     | 0.106<br>0.183       |
| Male                                      | -0.264**<br>0.017   | -0.106**<br>0.019  | -0.232**<br>0.019   | 0.0276<br>0.034    | 0.0237<br>0.026    | 0.160**<br>0.036    | -0.0258<br>0.019          | 0.0648*<br>0.029   | -0.191**<br>0.022   | 0.0887*<br>0.039   | 0.00857<br>0.026    | 0.179**<br>0.038          | 0.151**<br>0.049   | 0.253**<br>0.076     |
| Race, Black                               | -0.369**<br>0.023   | -0.287**<br>0.027  | 0.0186<br>0.025     | 0.0757<br>0.046    | 0.191**<br>0.034   | 0.104*<br>0.049     | -0.138**<br>0.026         | -0.0833*<br>0.04   | 0.0607*<br>0.03     | 0.0445<br>0.053    | 0.221**<br>0.036    | 0.0719<br>0.053           | 0.381**<br>0.067   | 0.329**<br>0.104     |
| Race, Other                               | -0.085<br>0.064     | -0.0627<br>0.073   | 0.0185<br>0.07      | -0.0715<br>0.131   | -0.178<br>0.11     | -0.349*<br>0.16     | -0.270**<br>0.074         | -0.349**<br>0.11   | 0.0204<br>0.085     | -0.18<br>0.148     | -0.179<br>0.1       | -0.396**<br>0.147         | -0.331<br>0.188    | -0.503<br>0.291      |
| Age as of January 1, 2004                 | -0.00862**<br>0.001 | -0.0193**<br>0.001 | -0.0151**<br>0.001  | -0.0298**<br>0.002 | 0.00197<br>0.001   | -0.0221**<br>0.002  | -0.0109**<br>0.001        | -0.0158**<br>0.001 | -0.0147**<br>0.001  | -0.0326**<br>0.002 | 0.00163<br>0.001    | -0.0231**<br>0.002        | 0.00624**<br>0.002 | -0.00689<br>0.004    |
| Number of months observed pre-transition  | 0.0118**<br>0.002   | 0.0112**<br>0.002  | -0.0127**<br>0.002  | -0.0139**<br>0.004 | -0.0126**<br>0.003 | -0.0227**<br>0.005  | 0.00906**<br>0.002        | 0.00939**<br>0.004 | -0.0102**<br>0.003  | -0.0175**<br>0.005 | -0.0110**<br>0.003  | -0.0235**<br>0.005        | 0.00324<br>0.006   | 0.000787<br>0.01     |
| Number of months observed post-transition | 0.00502**<br>0.001  | 0.00263*<br>0.001  | -0.00273**<br>0.001 | -0.00450*<br>0.002 | -0.00202<br>0.001  | -0.00741**<br>0.002 | 0.00998**<br>0.001        | 0.0105**<br>0.002  | -0.00388**<br>0.001 | -0.00530*<br>0.002 | -0.00278<br>0.001   | -0.00780**<br>0.002       | 0.00312<br>0.003   | -0.00127<br>0.004    |
| Constant                                  | 0.806**<br>0.069    | 0.210**<br>0.077   | -1.113**<br>0.079   | -1.980**<br>0.146  | -2.750**<br>0.112  | -2.209**<br>0.154   | 0.879**<br>0.072          | 0.567**<br>0.106   | -1.047**<br>0.093   | -1.741**<br>0.165  | -2.724**<br>0.111   | -2.142**<br>0.164         | -1.391**<br>0.211  | -1.286**<br>0.327    |
| N                                         | 175711              | 175711             | 175711              | 175711             | 175711             | 175711              | 175711                    | 175711             | 175711              | 175711             | 175711              | 175711                    | 175711             | 175711               |

Authors' calculations using merged Medicare and Medicaid claims and enrollment data. Reference categories are: Transition year- 2004; Race- White. Unexponentiated regression coefficients from GEE models and clustered standard errors are presented. Gamma-log models include all beneficiaries yielding estimates of unconditional use. Predicted estimates are calculated using the regression coefficients. \*p<0.05; \*\*p<0.01

**A4. Change in average monthly health care use following the transition to dual enrollment among adults with psychiatric disabilities, South Carolina 2004-2007.**

**Complete regression results for preferred specification.**

|                                           | BINARY OUTCOMES     |                    |                     |                    |                   |                    | COUNT/CONTINUOUS OUTCOMES |                    |                     |                    |                     |                           |                   |                      |
|-------------------------------------------|---------------------|--------------------|---------------------|--------------------|-------------------|--------------------|---------------------------|--------------------|---------------------|--------------------|---------------------|---------------------------|-------------------|----------------------|
|                                           | Outpatient          | Outpatient MHSUD   | ED                  | ED MHSUD           | Inpatient         | Inpatient MHSUD    | Outpatient                | Outpatient MHSUD   | ED                  | ED MHSUD           | Inpatient Admission | Inpatient Admission MHSUD | Inpatient Days    | Inpatient MHSUD days |
| Baseline trend                            | 0.0144**<br>0.004   | 0.00764<br>0.005   | 0.00398<br>0.006    | -0.0109<br>0.012   | -0.00021<br>0.009 | -0.00336<br>0.014  | 0.0130**<br>0.005         | 0.012<br>0.007     | -0.000482<br>0.007  | -0.00578<br>0.013  | -0.000657<br>0.009  | -0.00611<br>0.014         | 0.0122<br>0.016   | -0.00431<br>0.025    |
| Dual Coverage                             | 0.0980*<br>0.04     | 0.0506<br>0.041    | 0.0958<br>0.054     | 0.161<br>0.114     | 0.246**<br>0.086  | 0.357**<br>0.135   | -0.00234<br>0.025         | 0.0202<br>0.036    | 0.0905<br>0.061     | 0.047<br>0.129     | 0.260**<br>0.087    | 0.374**<br>0.14           | 0.542**<br>0.162  | 0.870**<br>0.244     |
| Trend change                              | -0.0143**<br>0.005  | -0.0123*<br>0.005  | -0.00496<br>0.006   | 0.00241<br>0.012   | -0.0057<br>0.01   | -0.0101<br>0.015   | -0.0152**<br>0.005        | -0.016<br>0.009    | 0.00398<br>0.007    | -0.00202<br>0.014  | -0.00476<br>0.009   | -0.00761<br>0.015         | -0.0251<br>0.017  | -0.0162<br>0.026     |
| Transition year, 2005                     | -0.160**<br>0.048   | -0.0392<br>0.053   | 0.0752<br>0.059     | -0.0699<br>0.121   | 0.116<br>0.09     | 0.149<br>0.135     | -0.0588<br>0.074          | 0.113<br>0.131     | 0.0984<br>0.074     | -0.136<br>0.135    | 0.111<br>0.093      | 0.153<br>0.145            | 0.227<br>0.165    | 0.101<br>0.248       |
| Transition year, 2006                     | 0.241**<br>0.054    | 0.0145<br>0.057    | 0.0612<br>0.065     | -0.055<br>0.128    | 0.17<br>0.101     | -0.0659<br>0.15    | 0.0658<br>0.079           | 0.104<br>0.138     | 0.056<br>0.082      | 0.139<br>0.15      | 0.155<br>0.103      | 0.0385<br>0.161           | 0.214<br>0.183    | -0.0171<br>0.275     |
| Transition year, 2007                     | 0.123<br>0.076      | -0.0168<br>0.083   | 0.251**<br>0.093    | 0.0547<br>0.185    | 0.409**<br>0.144  | 0.545**<br>0.209   | 0.201<br>0.114            | 0.505*<br>0.2      | 0.267*<br>0.117     | 0.13<br>0.215      | 0.391**<br>0.148    | 0.564*<br>0.231           | 0.646*<br>0.262   | 0.513<br>0.394       |
| Male                                      | -0.279**<br>0.029   | -0.124**<br>0.031  | -0.244**<br>0.036   | 0.219**<br>0.07    | -0.104<br>0.054   | 0.314**<br>0.079   | 0.054<br>0.045            | 0.168*<br>0.079    | -0.182**<br>0.044   | 0.275**<br>0.08    | -0.152**<br>0.055   | 0.337**<br>0.086          | 0.00631<br>0.098  | 0.466**<br>0.147     |
| Race, Black                               | -0.0147<br>0.028    | 0.164**<br>0.03    | -0.0412<br>0.034    | 0.0659<br>0.069    | 0.0609<br>0.052   | -0.0873<br>0.08    | 0.229**<br>0.043          | 0.452**<br>0.077   | -0.0247<br>0.043    | 0.0253<br>0.078    | 0.113*<br>0.054     | -0.129<br>0.084           | 0.153<br>0.095    | 0.0449<br>0.143      |
| Race, Other                               | 0.195<br>0.107      | 0.536**<br>0.109   | -0.418**<br>0.148   | -0.508<br>0.327    | -0.346<br>0.231   | -0.268<br>0.327    | 0.317<br>0.162            | 0.782**<br>0.288   | -0.525**<br>0.16    | -0.481<br>0.291    | -0.397*<br>0.2      | -0.472<br>0.312           | -0.553<br>0.354   | -0.823<br>0.532      |
| Age as of January 1, 2004                 | -0.00374**<br>0.001 | -0.0195**<br>0.001 | -0.00536**<br>0.002 | -0.0241**<br>0.003 | 0.000983<br>0.002 | -0.0172**<br>0.004 | -0.00944**<br>0.002       | -0.0163**<br>0.004 | -0.00798**<br>0.002 | -0.0283**<br>0.004 | -0.000881<br>0.003  | -0.0181**<br>0.004        | -0.00248<br>0.004 | -0.0114<br>0.007     |
| Number of months observed pre-transition  | 0.00719*<br>0.003   | -0.00668<br>0.004  | -0.00484<br>0.004   | -0.00936<br>0.009  | -0.00488<br>0.006 | -0.0296**<br>0.01  | 0.00284<br>0.005          | -0.00485<br>0.009  | -0.0138**<br>0.005  | -0.000604<br>0.01  | -0.00546<br>0.007   | -0.0258*<br>0.01          | -0.0231<br>0.012  | -0.0483**<br>0.018   |
| Number of months observed post-transition | 0.00723**<br>0.002  | 0.00255<br>0.002   | 0.00135<br>0.002    | -0.00414<br>0.004  | 0.00513<br>0.003  | -0.000058<br>0.005 | 0.00409<br>0.003          | 0.00297<br>0.004   | -0.00153<br>0.003   | -0.00393<br>0.005  | 0.00544<br>0.003    | 0.00224<br>0.005          | 0.00548<br>0.006  | -0.00367<br>0.009    |
| Constant                                  | 0.152<br>0.125      | -0.0168<br>0.137   | -1.740**<br>0.158   | -2.503**<br>0.316  | -3.386**<br>0.247 | -3.390**<br>0.377  | 0.467**<br>0.168          | -0.104<br>0.287    | -1.199**<br>0.193   | -2.346**<br>0.362  | -3.270**<br>0.248   | -3.403**<br>0.39          | -1.181**<br>0.445 | -0.876<br>0.669      |
| N                                         | 52899               | 52899              | 52899               | 52899              | 52899             | 52899              | 52899                     | 52899              | 52899               | 52899              | 52899               | 52899                     | 52899             | 52899                |

Authors' calculations using merged Medicare and Medicaid claims and enrollment data. Reference categories are: Transition year- 2004; Race- White. Unexponentiated regression coefficients from GEE models and clustered standard errors are presented. Gamma-log models include all beneficiaries yielding estimates of unconditional use. Predicted estimates are calculated using the regression coefficients. \*p<0.05; \*\*p<0.01
